## 12 **Abstract**

13           Alphaviruses are a diverse genus of arboviruses capable of infecting many vertebrates including  
14 humans. Human infection is common in equatorial and subtropical regions and is often accompanied by  
15 arthralgia or encephalitis depending on viral lineage. No antivirals or vaccines have been approved, and  
16 many alphavirus lineages have only recently been discovered and classified. Alphavirus nsP2 protease is  
17 an important virulence factor yet is commonly thought to be a simple papain-like protease which only  
18 cleaves viral polyproteins. Here, I reveal novel molecular mechanisms of these proteases via sequence  
19 and predicted structure alignment and propose novel cellular mechanisms for the pathogenesis of viral  
20 arthritis by predicting which human proteins are likely cleaved by these proteases. In addition to the  
21 known primary cysteine mechanism in all alphaviruses and a secondary serine mechanism documented  
22 in chikungunya virus (CHIKV), I discovered secondary cysteine and threonine mechanisms exist in many  
23 other alphaviruses and that these secondary mechanisms coevolve with their viral polyprotein  
24 cleavages. As for cleavage prediction, neural networks trained on 93 different putative viral polyprotein  
25 cleavages achieved a Matthews correlation coefficient of 0.965, and, when applied to the human  
26 proteome, predicted that hundreds of proteins may be vulnerable. Notable pathways likely affected by  
27 cleavages include the cytoskeleton and extracellular matrix, antiproteases, protein  
28 translation/folding/glycosylation/ubiquitination, cellular differentiation, inflammation, and vesicle  
29 trafficking, hinting that this viral protease is a more important virulence factor than previously believed.

## 31 **Introduction**

32           Alphavirus genomes contain two open reading frames encoding non-structural and structural  
33 polyproteins. Although the structural polyprotein is proteolytically processed by the capsid protein and  
34 host furin and signal peptidases, the non-structural polyprotein is processed typically by a cysteine  
35 protease contained within nsP2 (nsP2pro). A cleft for substrate binding exists between nsP2's C-terminal  
36 protease and S-adenosyl-L-methionine-dependent methyltransferase (MTase)-like subdomains  
37 connected by a flexible linker, and long-range interactions with nsP2's N-terminal helicase[1, 2] or any  
38 nsP3 domains before its separation are important for polyprotein processing and virulence yet remain  
39 poorly characterized.[3, 4] CHIKV nsP2pro has been found to not only contain a papain-like cysteine  
40 mechanism, but also an adjacent serine with similar activity.[5] This mechanism has not yet been found  
41 in any other alphaviruses, but it likely dramatically affects the stability, activity, and selectivity of  
42 nsP2pro. Additionally, a single mutation (N475A) near the N-terminus of the protease subdomain was  
43 found to cause the flexible N-terminal residues to occupy the cleft and inhibit catalysis.[6] This mutation  
44 does not, however, exist in any natural variants, and this study was not performed on full-length nsP2.  
45 The nuclear localization signal and RNA-binding helicase determining nuclear and virion localization of  
46 nsP2 likely also drive nsP2pro's selective pressures and multiple activities.[7] In addition to these  
47 subdomain interactions, most alphaviruses contain a stop codon at the end of nsP3 which is read  
48 through in 5-20% of polyproteins.[7, 9] Depending on this termination suppression, nsP2pro cleaves  
49 either two or three sites within the non-structural polyprotein with kinetic rates varying up to 25  
50 fold[10, 11] and, as with many viral proteases, is expected to cleave many host factors. To my  
51 knowledge, the antiviral TRIM14 is the only host protein experimentally verified to be cleaved by an  
52 alphavirus nsP2pro (Venezuelan equine encephalitis virus (VEEV) and somewhat by other New World  
53 alphaviruses).[12]

54           Due to the few cleavages per polyprotein and the continually expanding taxonomy of  
55 alphaviruses, few viral proteases or their cleavages have been characterized.[13] Following the  
56 successful application of machine learning methods to other viral proteases for cleavage prediction in  
57 human proteins,[14-16] computational analysis of alphavirus proteases will likely be an important step  
58 toward discovering additional therapeutic targets.

59

## 60 **Methods**

### 61 **Data Set Preparation**

62 A complete, manually reviewed human proteome containing 20,350 sequences (not including  
63 alternative isoforms) was retrieved from UniProt/Swiss-Prot (proteome:up000005640 AND  
64 reviewed:yes).[17] All polyprotein sequences within the family *Togaviridae* were collected from  
65 GenBank,[18] and 93 different cleavages were manually discovered using the Clustal Omega multiple  
66 sequence alignment server.[19-21] Similar cleavages are discoverable in divergent species within the  
67 order *Martellivirales* but were not included here because none infect animals. The next closest species  
68 that can infect humans are rubella (RUBV) and hepatitis E (HEV) viruses within the broader class  
69 *Alsuviricetes*, but their non-structural proteases have drastically different structures and activities than  
70 those within *Togaviridae* and were therefore also omitted. All unbalanced positive cleavages were used  
71 for subsequent classifier training in addition to all other 5,461 uncleaved alphavirus sequence windows  
72 with glycines in the P2 position, totaling 5,554 samples.

### 73 **Protease Structure Prediction and Analysis**

74 AlphaFold was used to predict the structures of alphavirus nsP2 sequences (only the C-terminal  
75 protease and MTase-like subdomains).[22] Predicted backbones were nearly identical to experimental  
76 data, and predicted catalytic dyad side chain distances ranged from 4 to 8 Å. Although AlphaFold does  
77 not have the ability to accurately predict the impact of single missense mutations on protein  
78 structures,[23, 24] this set of predicted structures and simulations, albeit on often nearly identical  
79 sequences, serves as a starting point to understanding the diversity of mechanisms within alphaviruses.  
80 CABS-flex was used to predict alternate conformations and flexibilities,[25] and zinc binding prediction  
81 was performed with ZincBind.[26] Molecular graphics and analyses were performed using UCSF  
82 ChimeraX, developed by the Resource for Biocomputing, Visualization, and Informatics at the University  
83 of California, San Francisco, with support from National Institutes of Health R01-GM129325 and the  
84 Office of Cyber Infrastructure and Computational Biology, National Institute of Allergy and Infectious  
85 Diseases.[27]

### 86 **Cleavage Prediction and Analysis**

87 As in my previous work on 3CLpro and PLpro,[14, 15] sequence logo-based logistic regression  
88 and naïve Bayes classification and physiochemical and one-hot encoded neural networks (NNs) were  
89 used for cleavage prediction.[28] To reduce any potential false positives, only proteins expressed in  
90 relevant cell types with cleavages with agreement between all five NN replicates and with total solvent-  
91 accessible surface areas (SASAs) of more than 100 Å<sup>2</sup> between positions P5 and P5' were reported.  
92 SASAs were calculated from AlphaFold predicted human protein structures[22] with the FreeSASA  
93 package.[29] Multiple synovial fluid and associated cell type proteomes and transcriptomes were  
94 compiled and cross-referenced to remove cleavages irrelevant to arthritic pathogenesis.[30-35]  
95 Predictions of the effects of cleavage on subcellular localizations were performed using the DeepLoc  
96 server.[36] All training data, prediction methods, and results can be found on GitHub  
97 (<https://github.com/Luke8472NN/NetProtease>).

## 98 **Results**

100 Although alphavirus proteases are diverse and not necessarily only papain-like, their cleavages  
101 resemble those of coronavirus papain-like protease (PLpro) but not of papain itself (Figure 1).[37] The  
102 repeated glycines and alanines in alphavirus cleavage positions P2, P1, and P1' were, however, easier to  
103 align than coronavirus PLpro cleavages. Dimensionality reduction of putative cleavages clustered by  
104 order within the polyprotein much more than by lineage (except for previously discovered cleavages in  
105 tymoviruses[38]), indicating that all cleavages within *Togaviridae* but not *Alsuviricetes* can be combined  
106 into a single data set to train machine learning models to apply to human sequences (Figure 2). Although  
107 no cleavages from species outside *Togaviridae* were included for training here, it is noteworthy that

108 turnip yellow mosaic virus (TYMV) protease is but HEV and RUBV proteases are not structurally related  
109 to alphavirus nsP2pro. TYMV protease includes an equivalent catalytic cysteine helix and activity-tuning  
110 histidine flexible loop[39] yet does not contain an MTase-like domain to form a cleft as in alphaviruses.  
111 In addition to this more accessible active site, TYMV protease includes two hydrophobic patches  
112 required for interaction with ubiquitin for its deubiquitinating activity (Figure 3).[40]  
113

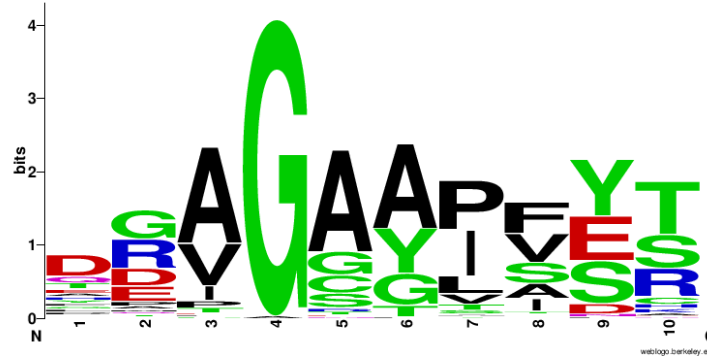

114  
115

Figure 1: Sequence logo for all 93 putative cleavage sites.[41]

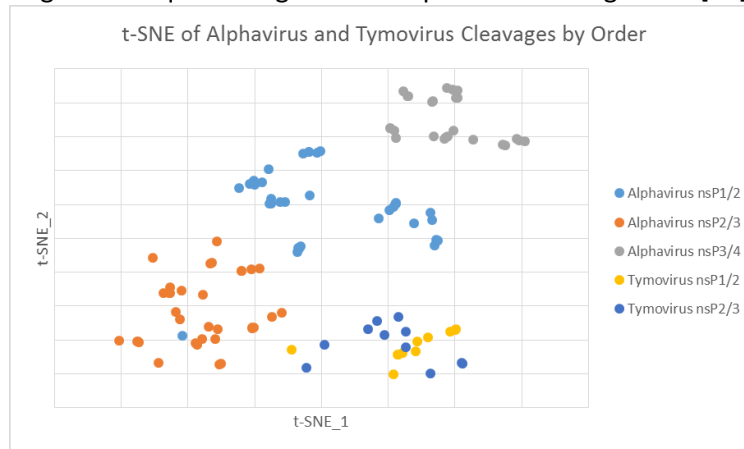

116  
117

Figure 2: One-hot encoded cleavage t-SNE colored by order within the polyprotein and by genus.[42]

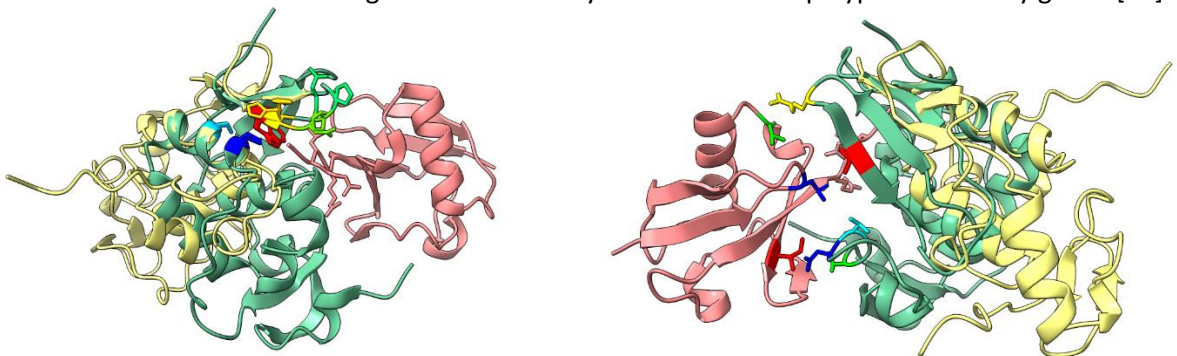

118  
119 Figure 3: (A) Structural similarity between CHIKV and TYMV proteases near their active sites but (B) not  
120 in ubiquitin binding regions. Only TYMV protease binds ubiquitin's I36 and I44 hydrophobic patches and  
121 its L8 loop. Tan ribbon is CHIKV, green ribbon is TYMV, red ribbon is ubiquitin (PDB code 6YPT).[27, 40]  
122

123 Alignment of all known alphavirus proteases (Figure 4) indicated that, in addition to a primary  
124 cysteine mechanism in all alphaviruses and a secondary serine mechanism found in at least CHIKV,[5]  
125 some proteases have secondary cysteine or threonine mechanisms. These secondary mechanisms may

126 restrict or extend the possible acidic residues aligning and polarizing the catalytic histidine,[43] and  
 127 serine and threonine mechanisms may extend catalytic activity to higher pH.[44] By investigating how  
 128 substrate sequences, particularly the P1 residue, coevolve with these different mechanisms, multiple  
 129 functional hypotheses can be proposed: (1) cleavage after a P1 cysteine is most efficient when the  
 130 secondary catalytic residue is another cysteine or serine, possible for an inert secondary alanine, and  
 131 least efficient for a secondary threonine, (2) a secondary threonine is required for cleavage after a P1  
 132 serine, and (3) an inert secondary alanine is required for cleavage after a P1 arginine.  
 133

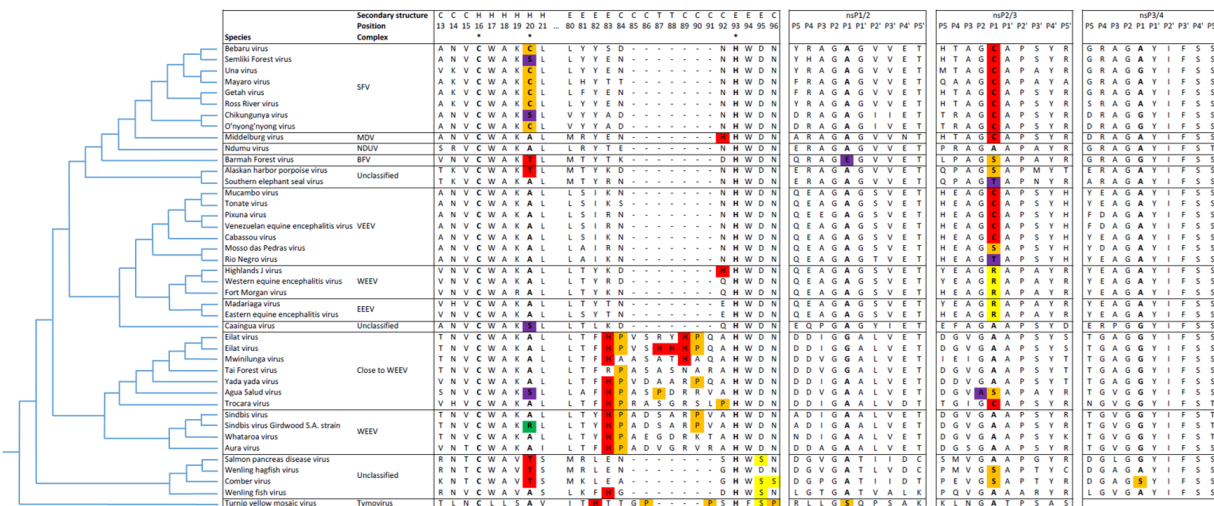

134  
 135 Figure 4: (A) Cladogram and multiple sequence alignment of the catalytic dyad and flexible loop of  
 136 alphavirus and TYMV proteases and (B) their respective aligned cleavages.  
 137

138 Near the catalytic histidine, other histidines or related positively charged amino acids in the  
 139 longer flexible loops of Western equine encephalitis complex and related viruses are close enough in  
 140 proximity with each other that they may bind ordered water molecules as in other proteases[45] or  
 141 metal ions in multiple conformations.[26] Unlike RUBV cysteine protease[46] and hepatitis C virus (HCV)  
 142 NS3 serine protease[47] which require metal ions in either a structural or catalytic (as in  
 143 metalloprotease) role for activity, metal ions are known to inhibit CHIKV protease.[48] In these  
 144 alphavirus proteases, metal binding may disrupt normal histidine alignment with aspartic acid[49] and  
 145 aim its protonated side toward the catalytic cysteine, serine, or threonine, preventing the charge relay  
 146 mechanism required for proteolysis (Figure 5A). Additionally, metal binding to another histidine in the  
 147 center of the loop may aid its flexing backward to allow substrate loading. In some divergent,  
 148 unclassified alphavirus proteases, the adjacent aspartic acid is replaced with serine, but in these cases  
 149 there is always another nearby potential metal-binding residue (glutamic acid, aspartic acid, or another  
 150 histidine)(Figure 5B).  
 151

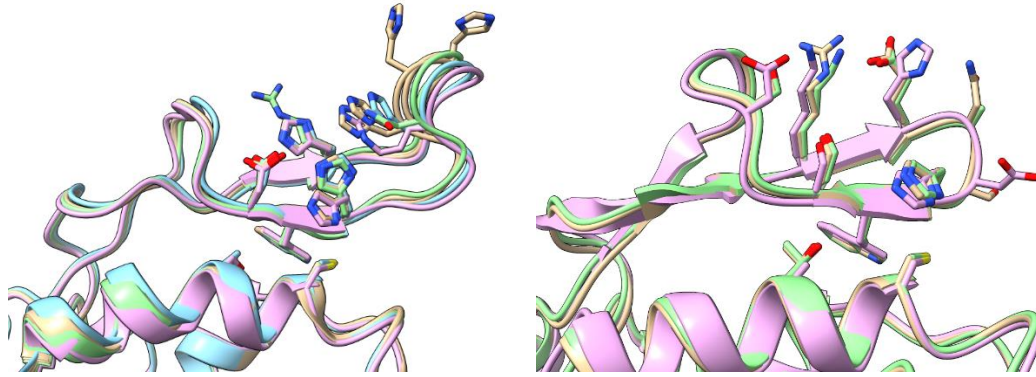

152  
153 Figure 5: (A) Proposed metal binding histidines and adjacent aspartic acid guiding charge relaying in  
154 proteolysis. Tan ribbons are Eilat viruses, one of which includes five histidine residues,[50] purple ribbon  
155 is Agua Salud virus (ASALV), green ribbon is Tai Forest virus, and blue ribbon is Mwinilunga virus. (B)  
156 Proposed alternative metal binding residues in divergent proteases. Tan ribbon is Salmonid virus, purple  
157 ribbon is Wenling fish virus, and green ribbon is Comber virus).[27]  
158

159 To my knowledge, no P2 glycine substitutions have been discovered in alphavirus cleavages, so  
160 it is noteworthy that ASALV[51] nsP2/3 cleavage (DGVAS<sup>^</sup>APAYR in MK959114.1 and MK959115.1)  
161 contains an alanine in this position (Figure 4). No sequence features obviously correlated with this  
162 substitution, and ASALV protease's predicted structure is extremely similar to those of related  
163 alphavirus proteases, indicating that other alphavirus proteases may also cleave alanine-containing  
164 substrates albeit possibly with suboptimal kinetics. Tryptophan is typically thought not to be directly  
165 involved in the active site, yet it appeared here to obstruct the secondary catalytic mechanism in some  
166 conformations (Figure 6A). In addition to the flexibility of the catalytic dyad, the size and flexibility of the  
167 variable loop between the protease domain  $\beta$ 1 and  $\beta$ 2 strands and its interaction with the MTase-like  
168 domain loop between  $\beta$ 7 strand and  $\alpha$ 9 helix (Figures 6B and 6C) likely determine the rate of substrate  
169 loading into the cleft and therefore cleavage kinetics.[52] Deletion of the exposed and most proximal  
170 MTase-like domain residue (typically leucine, phenylalanine, or tryptophan) and sharper backbone  
171 twisting by subsequent prolines in divergent alphaviruses may also widen the gap between these two  
172 loops and affect substrate loading or may allow serine to better fit in the P1 pocket instead of the more  
173 common alanine (Figure 6D). Sodium[53, 54] or other salt binding within this cleft may affect structure  
174 and substrate binding, and these deep cleft residues are not conserved between alphaviruses. No  
175 matter the width of this cleft, the nsP2/3 site remained over 40 Å away from the active site, supporting  
176 this site's proposed *trans* cleavage.[3] Even Salmonid virus' large insertions at the C-terminus of its nsP2  
177 MTase-like domain and between its nsP3 macro and zinc-binding domains did not affect this distance.  
178

179

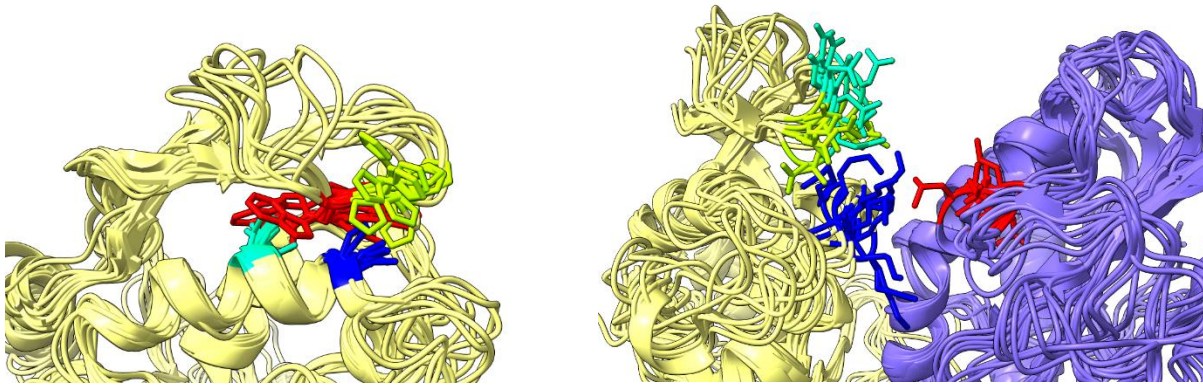

180

181

182

183

184

185

186

187

188

189

190

191

192

193

194

195

196

197

198

199

200

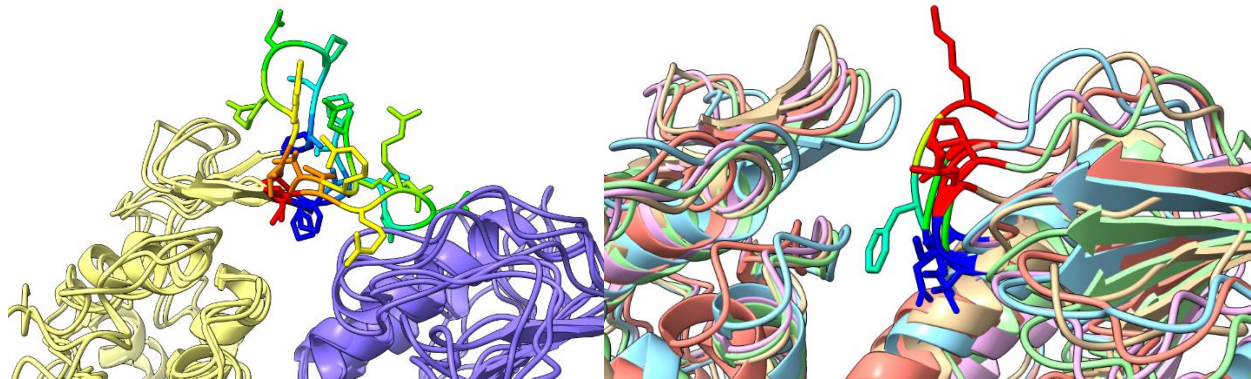

Figure 6: (A) CABS-flex ensemble of CHIKV nsP2pro flexible catalytic core and (B) flexible loop between protease subdomain (tan ribbon)  $\beta 1$  and  $\beta 2$  strands interacting with loop between MTase-like domain (purple ribbon)  $\beta 7$  strand and  $\alpha 9$  helix. (C) ASALV insertion within flexible loop.[25] (D) Similarity between interacting MTase-like domain loops with noteworthy deletions. Tan ribbon is Alaskan harbor porpoise virus, blue ribbon is Salmonid virus, purple ribbon is Wenling fish virus, green ribbon is Wenling hagfish virus, and red ribbon is Comber virus.[27]

As with both coronavirus protease cleavage predictions, NNs outperformed all other classifiers (Figure 7). The optimized hyperparameters for NNs with one-hot encoding were Adam solver, rectifier (ReLU) activation,  $1e-8$  regularization, no oversampling, and 1 hidden layer with 10 neurons. Combining networks into ensembles again improved accuracy and stability, so the final results were generated with 5 replicates of 10-fold cross-validated (CV) networks with an average Matthews correlation coefficient (MCC) of 0.965. Very few false positives existed for any prediction method, but two putative sites were somewhat conserved within the Semliki Forest (SF) complex nsP1 MTase-GTase core.[55] These two sites are predicted to be ordered and not solvent exposed and so are likely not biologically important. When applied to the human proteome, 714 of 20,350 proteins were predicted to be cleaved at least once. Enrichment analysis did not return useful results as for coronavirus protease predictions, so this large list was instead reduced as described in Methods to discuss only the most likely meaningful cleavages.

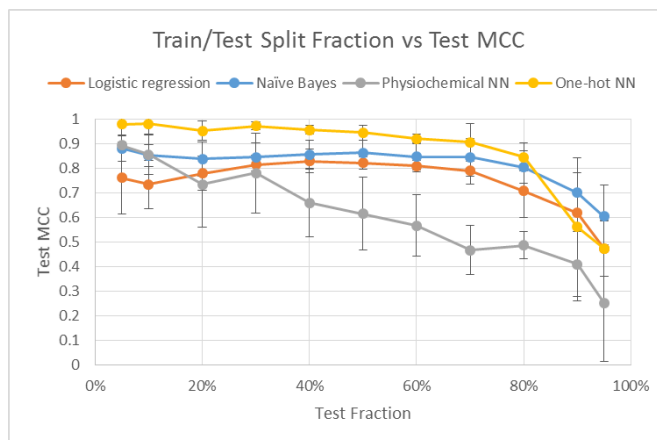

Figure 7: Train/test split fraction versus MCC demonstrating that the entire data set is not required for satisfactory accuracy.

201  
202  
203  
204

## 205 Discussion

206 Similar biases and caveats exist for nsP2pro predictions as with previous viral protease  
207 predictions,[14, 15] yet many host pathways likely perturbed by nsP2pro are discoverable. Experimental  
208 validation is, however, required for all of the following hypotheses. Reviewing only predicted cleavages  
209 with the highest scores and sufficient SASAs and relevant tissue expression produced a more targeted  
210 list of cleavages for interpretation. This list contains many proteins involved in the cytoskeleton and  
211 extracellular matrix (ECM), protease inhibition, protein translation/folding/glycosylation/ubiquitination,  
212 cellular differentiation including the transforming growth factor beta (TGF- $\beta$ ) and tumor necrosis factor  
213 alpha (TNF- $\alpha$ ) pathways, inflammation, and vesicle trafficking.

214 Cleavage of many cytoskeletal proteins likely contributes to altered virus and host component  
215 trafficking, yet cytoskeletal drugs have remained mostly ineffective against alphaviruses. These drugs  
216 may help prevent initial endocytosis,[56, 57] internalization of replication complexes in spherules into  
217 cytopathic vacuoles,[58] and virion release, yet alphaviruses are known to still replicate in their  
218 presence.[59, 60]

219 In the extracellular matrix, the most obviously affected region in arthritis, nsP2pro likely cleaves  
220 many structural proteins. In particular, cleavage of lubricin's hemopexin-like domain, similar to its  
221 normal cleavage by a human subtilisin-like proprotein convertase (SPC), may disrupt its ability to bind  
222 other proteins at the cartilage surface, reducing lubrication and promoting inflammation.[61] Cleavage  
223 of collagen alpha-1(XII) may disrupt normal shock-absorbing function.[62] In addition to the general  
224 matrix disruption likely resulting from cleavage of perlecan, elastin, von Willebrand factor A domain-  
225 containing protein 1 (WARP),[63] laminin, nidogen-1,[64] and thrombospondin-3 and -4,[65]  
226 degradation products of elastin and perlecan (laminin-like globular domain (LG3) of endorepellin) are  
227 documented to promote joint inflammation[66] and prevent angiogenesis in avascular cartilage,[67]  
228 respectively. Cleavage of specifically laminin subunit gamma-1 would not disrupt laminin binding  
229 membrane-bound integrins and dystrophins or extracellular collagen, but it may disrupt gamma subunit  
230 binding to nidogen and polymerization,[68, 69] freeing it up to be a more accessible alphavirus  
231 receptor.[70, 71] Similarly extracellularly secreted although not structural, nsP2pro has predicted  
232 cleavages near and within the bait regions of the serum and synovial fluid antiproteases alpha-2-  
233 macroglobulin (A2M) and pregnancy zone protein (PZP).[72, 73]

234 Noteworthy cleaved proteins involved in translation include signal recognition particle receptor  
235 subunit alpha (SRPRA), eukaryotic peptide chain release factor GTP-binding subunits (ERF3A/B), and La-  
236 related protein 1 (LARP1). Cleavage of SRPRA between its N-terminal SRX domain and its C-terminal  
237 targeting complex may reduce translocation of many proteins into the endoplasmic reticulum (ER). Only



238 the viral structural polyprotein contains a signal peptide, so this cleavage may also relate the kinetics of  
239 its N-terminal capsid protein autocleavage to its subsequent SRP association.[74, 75] Cleavage of release  
240 factors ERF3A/B expressed in osteoblasts and osteoclasts may promote stop codon readthrough critical  
241 to alphavirus infection.[76, 77] Cleavage of LARP1 may have effects similar to its documented inhibition  
242 by alphavirus capsid protein or by mTOR often activated early in infection.[78] This mechanism of  
243 inhibiting host translation differs between mosquito and vertebrate cells, is not required for viral  
244 production, but may be required for internalization of the replication complex.[79] Unlike viruses  
245 requiring eukaryotic initiation factor 2 (eIF2) for translation, alphavirus downstream hairpin loop (DLP)-  
246 mediated translation does not benefit from amino acid starvation, so the effects of alphaviruses on  
247 mTOR are more straightforward than those of picornaviruses, flaviviruses, etc. For example, cleavage of  
248 the E3 ubiquitin ligase tetratricopeptide repeat protein 3 (TTC3) may help activate AKT and downstream  
249 protein synthesis similar to its direct interaction with nsP3,[79, 80] and cleavage of TRIM63 may stabilize  
250 many proteins against amino acid starvation-associated degradation.

251 Also after translation, cleavage of the immunophilins peptidyl-prolyl cis-trans isomerases (PPI) H  
252 and FKBP10 may affect folding of many relevant proteins. These may (1) have immunosuppressive  
253 effects similar to inhibition by tacrolimus, (2) modulate calcineurin, ribonuclease A, and some  
254 interleukins with cis-prolines in their native states, (3) affect proline- and hydroxyproline-rich collagen  
255 structure (supported by nsP2pro's cleavage of prolyl 4-hydroxylase subunit alpha-1 and by documented  
256 excretion of proline and hydroxyproline in the urine of CHIKV-infected patients),[81] and (4) modulate  
257 alphavirus nsP3 proline-rich domain binding to amphiphysins involved in membrane bending of  
258 alphavirus-induced membrane organelles.[82, 83]

259 Enzymes involved in glycosylation also have predicted cleavages, although the differential  
260 effects this would have on viral versus host protein glycosylation remain unknown. Cleavage of  
261 mannosyl-oligosaccharide glucosidase (MOGS) may broadly disrupt viral protein glycosylation as in  
262 congenital disorders of this enzyme,[84] and cleavage of beta-1,4-galactosyltransferase 3 (B4GALT3)  
263 may disrupt complex N-linked glycans on immunoglobulins as in RA.[85] Cleavage of ER degradation-  
264 enhancing alpha-mannosidase-like protein 2 (EDEM2)[86] may disrupt host ERAD of viral  
265 glycoproteins[87] or redirect viral glycoproteins away from the cell membrane for internal budding as in  
266 SINV-infected mosquito cells.[88, 89] Cleavage of phosphoacetylglucosamine mutase (PAGM) may  
267 contribute to disruption of glycosaminoglycan polymers in cartilage and contribute to arthritic  
268 symptoms,[90] however N-acetylglucosamine (GlcNAc) supplementation sometimes used to treat  
269 osteoarthritis (OA) may be counterproductive given (1) it makes up some alphavirus glycans,[91] (2) it  
270 promotes replication of many other viruses *in vitro* and *in vivo*,[92] and (3) O-linked GlcNAc glycosylation  
271 of p65 aggravates TNF- $\alpha$ -mediated inflammation in rheumatoid arthritis (RA).[93]

272 Other predicted cleavages involved in protein degradation include the SUMO-specific E1 enzyme  
273 SAE1, the E2 enzyme UBE2Q1, the E3 enzyme UBR4, ubiquitin-1, and tripeptidyl peptidase 2 (TPP2). As  
274 with other viruses, modulation of SUMOylation is nontrivial and likely time-dependent; depletion of the  
275 only E2 for SUMO, UBC9, protects against CHIKV infection in mice,[94] yet depletion of SUMOylation  
276 enhances SFV replication in mosquito cells.[95] Cleavage of UBE2Q1 in muscle may disrupt B4GALT1-  
277 mediated cell adhesion to laminin and promote myoblast and satellite cell differentiation and syncytia  
278 formation[96, 97] to allow infection of myofibers without virion egress.[98-100] This is supported by the  
279 ability of alphaviruses to form filopodia-like protrusions mediating cell-to-cell transmission[101] and  
280 possibly to shield the virus from antibodies, making effective vaccination more difficult.[102] Cleavage of  
281 UBR4 may disrupt the N-end rule[103] to stabilize an inhibitor of apoptosis as with a picorna-like  
282 virus[104] or to stabilize cleaved viral functional proteins with less stable N-termini.[105] Cleavage of  
283 ubiquitin-1 between its ubiquitin-associated (UBA) and ubiquitin-like (UBL) domains may disrupt its  
284 trafficking ubiquitinated proteins to the proteasome[106] or its targeting of transmembrane  
285 proteins.[107, 108] Cleavage of the proteolytic TPP2 downstream of the 26S proteasome may promote

286 viral susceptibility as in TRIANGLE disease[109] and may affect the pool of short peptides available for  
287 MHC class I presentation.[110]

288 TGF- $\beta$  is known to be elevated in RA and during alphavirus infection,[111] and its inhibition can  
289 reduce joint swelling yet does not reduce viral titer[112] and can even promote CHIKV-mediated cell  
290 death *in vitro*. [113] Cleavage of latent TGF- $\beta$  binding protein 3 (LTBP3) near its ECM-binding C-terminus  
291 may be one mechanism alphaviruses employ to encourage release of TGF- $\beta$  from latency-associated  
292 peptide (LAP) when combined with normal cleavage by host proteases in its N-terminal hinge and C-  
293 terminus regions.[114, 115] These pathways are counterintuitive due to the many differential effects of  
294 TGF- $\beta$  and bone morphogenetic proteins (BMPs) on different cell types and their interactions  
295 throughout their differentiation.[116] In the mesenchymal (MSC) lineage, TGF- $\beta$  stimulates proliferation  
296 and differentiation of MSCs into chondrocytes and osteoblast progenitors into osteoblasts with  
297 downregulated RANKL. The closely related BMPs, however, can oppose TGF- $\beta$  and are required for late  
298 stage osteoblast differentiation through their different SMAD signal transducers.[117] In the  
299 hematopoietic (HSC) lineage, TGF- $\beta$  keeps HSCs in hibernation and prevents osteoclast progenitor  
300 differentiation into mature osteoclasts at least partially due to disrupted RANKL/OPG ratio.[118]  
301 Alphavirus infection is, however, more complex than elevated TGF- $\beta$  alone and is associated with  
302 increased RANKL/OPG ratio and therefore osteoclastogenesis[119, 120] likely via upregulated IL-6  
303 positive feedback[121, 122] and disrupted osteoblastogenesis via reduced RUNX2.[123] This TGF- $\beta$   
304 disruption may direct stem cells toward differentiated lineages more susceptible to infection, yet  
305 disruption of other pathways may be able to prevent apoptosis in these differentiated cells. For  
306 example, cleavage of TNFR2 may prevent TNF- $\alpha$  transduction and even shed soluble TNFR2 which can,  
307 like its alternately spliced products, antagonize its full-length activity and downstream apoptosis of  
308 infected cells.[124]

309 Likely also in an attempt to prevent inflammation and death of infected cells, cleavage of  
310 PYCARD between its pyrin domain (PYD) and caspase recruitment domain (CARD) may disrupt normal  
311 inflammasome formation and act like host CARD only proteins (COPs) or pyrin only proteins (POPs),  
312 inhibiting caspase 1 and its target cytokines.[125] As for other inflammatory molecular classes likely  
313 affected, polyamines are generally required by RNA viruses,[126, 127] and exogenous polyamines can  
314 restore inflammation and immune dysregulation in RA and OA.[128-130] Cleavage of diamine  
315 acetyltransferase 1 (SAT1) would increase intracellular polyamine concentration by preventing export  
316 and may (1) promote DNA methylation and reduce host transcription via S-adenosyl methionine (SAM)  
317 metabolism,[131] (2) downregulate IL-2 in PBMCs and contribute to decreased T cell effector function as  
318 in RA,[132] (3) enhance translation of polyproline motifs such as collagen and alphavirus nsP3 proline-  
319 rich domain,[133] (4) speed up peptidyl-tRNA hydrolysis by termination factor eRF1 via its hypusine  
320 modification,[134] and (5) promote stop codon readthrough by altering tRNA conformation.[135]  
321 Cleavage of histidine decarboxylase (HDC), glutathione hydrolase 5 (GGT5), and phospholipase A and  
322 acyltransferase 3 (PLAAT3) would, however, oppose typical inflammation in RA (where histamine[136]  
323 and lysophospholipids[137] are elevated and glutathione[138] is depleted), serving as a reminder that  
324 viral arthritis is caused more by the immune response to infection than by the virus or nsP2pro.

325 Lastly, the effects of predicted cleavages in vesicle transporting proteins are difficult to interpret  
326 because both retrograde and anterograde pathways are affected. Major differences exist between  
327 alphavirus-induced mammalian and mosquito membrane rearrangements, so experimental  
328 characterization is required to understand the relevance of these cleavages in each host.[139, 140]

329

### 330 **Conclusion**

331 These predicted cleavages hint at many expected and novel mechanisms and indicate that  
332 nsP2pro is a much more important virulence factor than previously believed. Substrate docking and  
333 molecular dynamics may provide additional information about molecular mechanisms of these

334 proteases, and protease-specific kinetics and biological significance of these cleavages require  
335 experimental verification. Expansion of this data set to include all of *Martellivirales* or *Alsuviricetes* may  
336 also provide insight into how these molecular mechanisms evolved, but their inclusion into a cleavage  
337 prediction training data set would likely worsen the trained model's accuracy for the human viruses  
338 discussed here. Even though many caveats exist without experimentation, similar prediction and  
339 interpretation should be performed for all other viral proteases.

340

## 341 References

- 342 1. Law YS, Utt A, Tan YB, Zheng J, Wang S, Chen MW, et al. Structural insights into RNA recognition by  
343 the Chikungunya virus nsP2 helicase. PNAS. 2019 May;116(19):9558-67. doi:  
344 [10.1073/pnas.1900656116](https://doi.org/10.1073/pnas.1900656116) PMID: 31000599
- 345 2. Law YS, Wang S, Tan YB, Shih O, Utt A, Goh WY, et al. Interdomain flexibility of chikungunya virus  
346 nsP2 helicase-protease differentially influences viral RNA replication and infectivity. J Virol. 2021  
347 Feb;95(6):e01470-20. doi: [10.1128/JVI.01470-20](https://doi.org/10.1128/JVI.01470-20) PMID: 33328310
- 348 3. Shin G, Yost SA, Miller MT, Elrod EJ, Grakoui A, Marcotrigiano J. Structural and functional insights  
349 into alphavirus polyprotein processing and pathogenesis. PNAS. 2012 Oct;109(41):16534-9. doi:  
350 [10.1073/pnas.1210418109](https://doi.org/10.1073/pnas.1210418109) PMID: 23010928
- 351 4. Saul S, Ferguson M, Cordonin C, Fragkoudis R, Ool M, Tamberg N, et al. Differenced in processing  
352 determinants of nonstructural polyprotein and in the sequence of nonstructural protein 3 affect  
353 neurovirulence of Semliki Forest virus. J Virol. 2015 Nov;89(21):11030-45. doi: [10.1128/JVI.01186-15](https://doi.org/10.1128/JVI.01186-15)  
354 PMID: 26311875
- 355 5. Saisawang C, Saitornuang S, Sillapee P, Ubol S, Smith DR, Ketterman AJ. Chikungunya nsP2 protease  
356 is not a papain-like cysteine protease and the catalytic dyad cysteine is interchangeable with a  
357 proximal serine. Sci Rep. 2015 Nov;5:17125. doi: [10.1038/srep17125](https://doi.org/10.1038/srep17125) PMID: 26597768
- 358 6. Compton JR, Mickey MJ, Hu X, Marugan JJ, Legler PM. Mutation of Asn-475 in the Venezuelan  
359 equine encephalitis virus nsP2 cysteine protease leads to a self-inhibited state. Biochemistry. 2017  
360 Nov;56(47):6221-30. doi: [10.1021/acs.biochem.7b00746](https://doi.org/10.1021/acs.biochem.7b00746) PMID: 29064679
- 361 7. Schuchman R, Kilianski A, Piper A, Vancini R, Ribeiro JMC, Sprague TR, et al. Comparative  
362 characterization of the Sindbis virus proteome from mammalian and invertebrate hosts identifies  
363 nsP2 as a component of the virion and sorting nexin 5 as a significant host factor for alphavirus  
364 replication. J Virol. 2018 Jul;92(14):e00694-18. doi: [10.1128/JVI.00694-18](https://doi.org/10.1128/JVI.00694-18) PMID: 29743363
- 365 8. de Groot RJ, Hardy WR, Shirako Y, Strauss JH. Cleavage-site preferences of Sindbis virus polyproteins  
366 containing the non-structural proteinase. Evidence for temporal regulation of polyprotein  
367 processing *in vivo*. EMBO J. 1990 Aug;9(8):2631-8. PMID: 2142454
- 368 9. Shirako Y, Strauss JH. Regulation of Sindbis virus RNA replication: Uncleaved P123 and nsP4 function  
369 in minus-strand RNA synthesis, whereas cleaved products from P123 are required for efficient plus-  
370 strand RNA synthesis. J Virol. 1994 Mar;68(3):1874-85. doi: [10.1128/JVI.68.3.1874-1885.1994](https://doi.org/10.1128/JVI.68.3.1874-1885.1994) PMID:  
371 8107248
- 372 10. Hu X, Compton JR, Leary DH, Olson MA, Lee MS, Cheung J, et al. Kinetic, mutational, and structural  
373 studies of the Venezuelan equine encephalitis virus nonstructural protein 2 cysteine protease.  
374 Biochemistry. 2016 May;55(21):3007-19. doi: [10.1021/acs.biochem.5b00992](https://doi.org/10.1021/acs.biochem.5b00992) PMID: 27030368
- 375 11. Bozoki B, Motyan JA, Hoffka G, Waugh DS, Tozser J. Specificity studies of the Venezuelan equine  
376 encephalitis virus non-structural protein 2 protease using recombinant fluorescent substrates. Int J  
377 Mol Sci. 2020 Oct;21(20):7686. doi: [10.3390/ijms21207686](https://doi.org/10.3390/ijms21207686) PMID: 33081394
- 378 12. Morazzani EM, Compton JR, Leary DH, Berry AV, Hu X, Marugan JJ, et al. Proteolytic cleavage of host  
379 proteins by the Group IV viral proteases of Venezuelan equine encephalitis virus and Zika virus.  
380 Antiviral Res. 2019 Apr;164:106-22. doi: [10.1016/j.antiviral.2019.02.001](https://doi.org/10.1016/j.antiviral.2019.02.001) PMID: 30742841

- 381 13. Abu Bakar F, Ng LFP. Nonstructural proteins of alphavirus—Potential targets for drug development.  
382 Viruses. 2018 Feb;10(2):71. doi: [10.3390/v10020071](https://doi.org/10.3390/v10020071) PMID: 29425115
- 383 14. Prescott L. SARS-CoV-2 3CLpro whole human proteome cleavage prediction and  
384 enrichment/depletion analysis. bioRxiv [Preprint]. 2020 Aug. doi: [10.1101/2020.08.24.265645](https://doi.org/10.1101/2020.08.24.265645)
- 385 15. Prescott L. SARS-CoV-2 PLpro whole human proteome cleavage prediction and  
386 enrichment/depletion analysis. bioRxiv [Preprint]. 2021 Oct. doi: [10.1101/2021.10.04.462902](https://doi.org/10.1101/2021.10.04.462902)
- 387 16. Stanley JT, Gilchrist AR, Stabell AC, Allen MA, Sawyer SL, Dowell RD. Two-stage ML classifier for  
388 identifying host protein targets of the dengue protease. Pac Symp Biocomput. 2020 Jan;25:487-98.  
389 PMID: 31797621
- 390 17. The UniProt Consortium. UniProt: a worldwide hub of protein knowledge. Nucleic Acids Res. 2019  
391 Jan;47(D1):D505-15. doi: [10.1093/nar/gky1049](https://doi.org/10.1093/nar/gky1049) PMID: 30395287
- 392 18. Benson DA, Cavanaugh M, Clark K, Karsch-Mizrachi I, Lipman DJ, Ostell J. GenBank. Nucleic Acids  
393 Res. 2017 Jan;45(D1):D37-42. doi: [10.1093/nar/gkw1070](https://doi.org/10.1093/nar/gkw1070) PMID: 27899564
- 394 19. Sievers F, Wilm A, Dineen D, Gibson TJ, Karplus K, Li W, et al. Fast, scalable generation of high-  
395 quality protein multiple sequence alignments using Clustal Omega. Mol Syst Biol. 2011 Oct;7:539.  
396 doi: [10.1038/msb.2011.75](https://doi.org/10.1038/msb.2011.75) PMID: 21988835
- 397 20. Goujon M, McWilliam H, Li W, Valentin F, Squizzato S, Paern J, et al. A new bioinformatics analysis  
398 tools framework at EMBL-EBI. Nucleic Acids Res. 2010 Jul;38(2):W695-9. doi: [10.1093/nar/gkq313](https://doi.org/10.1093/nar/gkq313)  
399 PMID: 20439314
- 400 21. McWilliam H, Li W, Uludag M, Squizzato S, Park YM, Buso N, et al. Analysis tool web services from  
401 the EMBL-EBI. Nucleic Acids Res. 2013 Jul;41(W1):W597-600. doi: [10.1093/nar/gkt376](https://doi.org/10.1093/nar/gkt376) PMID:  
402 23671338
- 403 22. Tunyasuvunakool K, Adler J, Wu Z, Green T, Zielinski M, Židek A, et al. (2021) Highly accurate protein  
404 structure prediction for the human proteome. Nature. 2021 Jul;596:590-6. doi: [10.1038/s41586-  
405 021-03828-1](https://doi.org/10.1038/s41586-021-03828-1) PMID: 34293799
- 406 23. Buel GR, Walters KJ. Can AlphaFold2 predict the impact of missense mutations on structure? Nat  
407 Struct Mol Biol. 2022 Jan;29(1):1-2. doi: [10.1038/s41594-021-00714-2](https://doi.org/10.1038/s41594-021-00714-2) PMID: 35046575
- 408 24. Pak MA, Markhieva KA, Novikova MS, Petrov DS, Vorobyev IS, Maksimova ES, et al. Using AlphaFold  
409 to predict the impact of single mutations on protein stability and function. bioRxiv [Preprint]. 2021  
410 Sep. doi: [10.1101/2021.09.19.460937](https://doi.org/10.1101/2021.09.19.460937)
- 411 25. Kuriata A, Gierut AM, Oleniecki T, Ciemny MP, Kolinski A, Kurcinski M, et al. CABS-flex 2.0: a web  
412 server for fast simulations of flexibility of protein structures. Nucleic Acids Res. 2018  
413 Jul;46(W1):W338-43. doi: [10.1093/nar/gky356](https://doi.org/10.1093/nar/gky356) PMID: 29762700
- 414 26. Ireland SM, Martin ACR. ZincBind—the database of zinc binding sites. Database (Oxford). 2019  
415 Jan;2019:baz006. doi: [10.1093/database/baz006](https://doi.org/10.1093/database/baz006) PMID: 30722040
- 416 27. Pettersen EF, Goddard TD, Huang CC, Meng EC, Couch GS, Croll TI, et al. UCSF ChimeraX: Structure  
417 visualization for researchers, educators, and developers. Protein Sci. 2021 Jan;30(1):70-82. doi:  
418 [10.1002/pro.3943](https://doi.org/10.1002/pro.3943) PMID: 32881101
- 419 28. Pedregosa F, Varoquaux G, Gramfort A, Michel V, Thirion B, Grisel O, et al. Scikit-learn: Machine  
420 Learning in Python. J Mach Learn Res. 2011 Oct;12:2825-30.  
421 <http://jmlr.csail.mit.edu/papers/v12/pedregosa11a.html>
- 422 29. Mitternacht S. FreeSASA: An open source C library for solvent accessible surface area calculations.  
423 F1000Research. 2016 Feb;5:189. doi: [10.12688/f1000research.7931.1](https://doi.org/10.12688/f1000research.7931.1) PMID: 26973785
- 424 30. Birkelund S, Bennike TB, Kastaniegaard K, Lausen M, Poulsen TBG, Kragstrup TW, et al. Proteomic  
425 analysis of synovial fluid from rheumatic arthritis and spondyloarthritis patients. Clin Proteomics.  
426 2020 Aug;17:29. doi: [10.1186/s12014-020-09292-9](https://doi.org/10.1186/s12014-020-09292-9) PMID: 32782445
- 427 31. Lambrecht S, Dhaenens M, Almqvist F, Verdonk P, Verbruggen G, Deforce D, et al. Proteome  
428 characterization of human articular chondrocytes leads to novel insights in the function of small

- 429 heat-shock proteins in chondrocyte homeostasis. *Osteoarthritis Cartilage*. 2010 Mar;18(3):440-6.  
430 doi: [10.1016/j.joca.2009.10.008](https://doi.org/10.1016/j.joca.2009.10.008) PMID: 19879248
- 431 32. Alves R DAM, Eijken M, Swagemakers S, Chiba H, Titulaer MK, Buruegrs PC, et al. Proteomic analysis  
432 of human osteoblastic cells: relevant proteins and functional categories for differentiation. *J*  
433 *Proteome Res*. 2010 Sep;9(9):4688-700. doi: [10.1021/pr100400d](https://doi.org/10.1021/pr100400d) PMID: 20690663
- 434 33. An E, Narayanan M, Manes NP, Nita-Lazar A. Characterization of functional reprogramming during  
435 osteoclast development using quantitative proteomics and mRNA profiling. *Mol Cell Proteomics*.  
436 2014 Oct;13(10):2687-704. doi: [10.1074/mcp.M113.034371](https://doi.org/10.1074/mcp.M113.034371) PMID: 25044017
- 437 34. Chou CH, Jain V, Gibson J, Attarian DE, Haraden CA, Yohn CB, et al. Synovial cell cross-talk with  
438 cartilage plays a major role in the pathogenesis of osteoarthritis. *Sci Rep*. 2020 Jul;10(1):10868. doi:  
439 [10.1038/s41598-020-67730-y](https://doi.org/10.1038/s41598-020-67730-y) PMID: 32616761
- 440 35. Sukkaew A, Suksatu A, Roytrakul S, Smith DR, Ubol S. Proteomic analysis of CHIKV-infected human  
441 fibroblast-like synoviocytes: Identification of host factors potentially associated with CHIKV  
442 replication and cellular pathogenesis. *Microbiol Immunol*. 2020 Jun;64(6):445-57. doi:  
443 [10.1111/1348-0421.12793](https://doi.org/10.1111/1348-0421.12793) PMID: 32246487
- 444 36. Almagro Armenteros JJ, Sonderby CK, Sonderby SK, Nielsen H, Winther O. DeepLoc: prediction of  
445 protein subcellular localization using deep learning. *Bioinformatics*. 2017 Jul;33(21):3387-95. doi:  
446 [10.1093/bioinformatics/btx431](https://doi.org/10.1093/bioinformatics/btx431) PMID: 29036616
- 447 37. Rawlings ND, Barrett AJ, Bateman A. *MEROPS*: the database of proteolytic enzymes, their substrates  
448 and inhibitors. *Nucleic Acids Res*. 2012 Jan. 40(Database issue):D343-50. doi: [10.1093/nar/gkr987](https://doi.org/10.1093/nar/gkr987)  
449 PMID: 22086950
- 450 38. Jakubiec A, Dugeon G, Camborde L, Jupin I. Proteolytic processing of *turnip yellow mosaic virus*  
451 replication proteins and functional impact on infectivity. *J Virol*. 2007 Oct;81(20):11402-12. doi:  
452 [10.1128/JVI.01428-07](https://doi.org/10.1128/JVI.01428-07) PMID: 17686855
- 453 39. Jupin I, Ayach M, Jomat L, Fieulaine S, Bressanelli S. A mobile loop near the active site acts as a  
454 switch between the dual activities of a viral protease/deubiquitinase. *PLOS Pathog*. 2017  
455 Nov;13(11):e1006714. doi: [10.1371/journal.ppat.1006714](https://doi.org/10.1371/journal.ppat.1006714) PMID: 29117247
- 456 40. Fieulaine S, Witte MD, Theile CS, Ayach M, Ploegh HL, Jupin I, et al. Turnip yellow mosaic virus  
457 protease binds ubiquitin suboptimally to fine-tune its deubiquitinase activity. *J Biol Chem*. 2020  
458 Oct;295(40):13769-83. doi: [10.1074/jbc.RA120.014628](https://doi.org/10.1074/jbc.RA120.014628) PMID: 32732284
- 459 41. Crooks GE, Hon G, Chandonia JM, Brenner SE. WebLogo: A sequence logo generator. *Genome Res*.  
460 2004 Jun;14:1188-90. doi: [10.1101/gr.849004](https://doi.org/10.1101/gr.849004) PMID: 15173120
- 461 42. van der Maaten L, Hinton G. Visualizing data using t-SNE. *J Mach Learn Res*. 2008 Nov;9:2579-605.  
462 doi: <http://www.jmlr.org/papers/v9/vandermaaten08a.html>
- 463 43. Ekici OD, Paetzel M, Dalbey RE. Unconventional serine proteases: Variations on the catalytic  
464 Ser/His/Asp triad configuration. *Protein Sci*. 2008 Dec;17(12):2023-37. doi: [10.1110/ps.035436.108](https://doi.org/10.1110/ps.035436.108)  
465 PMID: 18824507
- 466 44. Hofer F, Kraml J, Kahler U, Kamenik AS, Liedl KR. Catalytic site pKa values of aspartic, cysteine, and  
467 serine proteases: Constant pH MD simulations. *J Chem Inf Model*. 2020 Jun;60(6):3030-42. doi:  
468 [10.1021/acs.jcim.0c00190](https://doi.org/10.1021/acs.jcim.0c00190) PMID: 32348143
- 469 45. Zephyr J, Yilmaz NK, Schiffer CA. Viral proteases: Structure, mechanism and inhibition. *Enzymes*.  
470 2021 Nov;50:301-33. doi: [10.1016/bs.enz.2021.09.004](https://doi.org/10.1016/bs.enz.2021.09.004) PMID: 34861941
- 471 46. Liu X, Yang J, Chazi AM, Frey TK. Characterization of the zinc binding activity of the rubella virus  
472 nonstructural protease. *J Virol*. 2000 Jul;74(13):5949-56. doi: [10.1128/jvi.74.13.5949-5956.2000](https://doi.org/10.1128/jvi.74.13.5949-5956.2000)  
473 PMID: 10846076
- 474 47. Stempniak M, Hostomska Z, Nides BR, Hostomsky Z. The NS3 proteinase of hepatitis C virus is a  
475 zinc-containing enzyme. *J Virol*. 1997 Apr;71(4):2881-6. doi: [10.1128/JVI.71.4.2881-2886.1997](https://doi.org/10.1128/JVI.71.4.2881-2886.1997) PMID:  
476 9060645

- 477 48. Saisawang C, Sillapee P, Sinsirimongkol K, Ubol S, Smith DR, Ketterman AJ. Full length and protease  
478 domain activity of chikungunya virus nsP2 differ from other alphavirus nsP2 proteases in recognition  
479 of small peptide substrates. *Biosci Rep*. 2015 Jun;35(3):e00196. doi: [10.1042/BSR20150086](https://doi.org/10.1042/BSR20150086) PMID:  
480 26182358
- 481 49. Lin YL, Lim C. Factors governing the protonation state of Zn-bound histidine in proteins: a DFT/DCM  
482 study. *J Am Chem Soc*. 2004 Mar;126(8):2606-12. doi: [10.1021/ja038827r](https://doi.org/10.1021/ja038827r) PMID: 14982470
- 483 50. Bennouna A, Gil P, El Rhaffouli H, Exbrayat A, Loire E, Balenghien T, et al. Identification of Eilat virus  
484 and prevalence of infection among *Culex pipiens L.* populations, Morocco, 2016. *Virology*. 2019  
485 Apr;530:85-8. doi: [10.1016/j.virol.2019.02.007](https://doi.org/10.1016/j.virol.2019.02.007) PMID: 30782566
- 486 51. Hermanns K, Marklewitz M, Zirkel F, Overheul GJ, Page RA, Loaiza JR, et al. Agua Salud alphavirus  
487 defines a novel lineage of insect-specific alphaviruses discovered in the New World. *J Gen Virol*.  
488 2020 Jan;101(1):96-104. doi: [10.1099/jgv.0.001344](https://doi.org/10.1099/jgv.0.001344) PMID: 31674898
- 489 52. Narwal M, Singth H, Pratap S, Malik A, Kuhn RJ, Kumar P, et al. Crystal structure of chikungunya virus  
490 nsP2 cysteine protease reveals a putative flexible loop blocking its active site. *Int J Biol Macromol*.  
491 2018 Sep;116:451-62. doi: [10.1016/j.ijbiomac.2018.05.007](https://doi.org/10.1016/j.ijbiomac.2018.05.007) PMID: 29730006
- 492 53. (a) Research Collaboratory for Structural Bioinformatics Protein Data Bank.  
493 <https://www.rcsb.org/structure/3TRK> (accessed 2022-01-13). (b) Cheung J, Franklin M, Mancina F,  
494 Rudolph M, Cassidy M, Gary E, et al. Structure of the chikungunya virus nsP2 protease. Unpublished  
495 work. 2011 Sep.
- 496 54. Lev B, Roux B, Noskov SY. Sodium-binding site types in proteins. In: Kretsinger RH, Uversky VN,  
497 Permyakov EA, editors. *Encyclopedia of metalloproteins*. New York: Springer; 2013. pp. 2112-8. doi:  
498 [10.1007/978-1-4614-1533-6\\_242](https://doi.org/10.1007/978-1-4614-1533-6_242)
- 499 55. Ahola T, Karlin DG. Sequence analysis reveals a conserved extension in the capping enzyme of the  
500 alphavirus supergroup, and a homologous domain in nodaviruses. *Biol Direct*. 2015 Apr;10:16. doi:  
501 [10.1186/s13062-015-0050-0](https://doi.org/10.1186/s13062-015-0050-0) PMID: 25886938
- 502 56. Bernard E, Solignat M, Gay B, Chazal N, Higgs S, Devaux C, et al. Endocytosis of chikungunya virus  
503 into mammalian cells: role of clathrin and early endosomal compartments. *PLOS One*. 2010  
504 Jul;5(7):e11479. doi: [10.1371/journal.pone.0011479](https://doi.org/10.1371/journal.pone.0011479) PMID: 20628602
- 505 57. Hoornweg TE, Bouma EM, van de Pol DPI, Rodenhuis-Zybert IA, Smit JM. Chikungunya virus requires  
506 an intact microtubule network for efficient viral genome delivery. *PLOS Negl Trop Dis*. 2020  
507 Aug;14(8):e0008469. doi: [10.1371/journal.pntd.0008469](https://doi.org/10.1371/journal.pntd.0008469) PMID: 32764759
- 508 58. Spuul P, Balistreri G, Kaariainen L, Ahola T. Phosphatidylinositol 3-kinase-, actin-, and microtubule-  
509 dependent transport of Semliki Forest virus replication complexes from the plasma membrane to  
510 modified lysosomes. *J Virol*. 2010 Aug;84(15):7543-57. doi: [10.1128/JVI.00477-10](https://doi.org/10.1128/JVI.00477-10) PMID: 20484502
- 511 59. Gil PI, Albrieu-Llinas G, Mlewski EC, Monetti M, Fozzatti L, Cuffini C, et al. Pixuna virus modifies host  
512 cell cytoskeleton to secure infection. *Sci Rep*. 2017 Jul;7(1):5757. doi: [10.1038/s41598-017-05983-w](https://doi.org/10.1038/s41598-017-05983-w)  
513 PMID: 28720756
- 514 60. Matthews JD, Morgan R, Sleighter C, Frey TK. Do viruses require the cytoskeleton? *Virol J*. 2013  
515 Apr;10(1):121. doi: [10.1186/1743-422X-10-121](https://doi.org/10.1186/1743-422X-10-121) PMID: 23597412
- 516 61. Rhee DK, Marcelino J, Al-Mayouf S, Schelling DK, Bartels CF, Cui Y, et al. Consequences of disease-  
517 causing mutations on lubricin protein synthesis, secretion, and post-transcriptional processing. *J Biol*  
518 *Chem*. 2005 Sep;280(35):32325-32. doi: [10.1074/jbc.M505401200](https://doi.org/10.1074/jbc.M505401200) PMID: 16000300
- 519 62. Luo Y, Sinkeviciute D, He Y, Karsdal M, Henrotin Y, Mobasheri A, et al. The minor collagens in  
520 articular cartilage. *Protein Cell*. 2017 Aug;8(8):560-72. doi: [10.1007/s13238-017-0377-7](https://doi.org/10.1007/s13238-017-0377-7) PMID:  
521 28213717
- 522 63. Allen JM, Bateman JF, Hansen U, Wilson R, Bruckner P, Owens RT, et al. WARP is a novel multimeric  
523 component of the chondrocyte pericellular matrix that interacts with perlecan. *J Biol Chem*. 2006  
524 Mar;281(11):7341-9. doi: [10.1074/jbc.M513746200](https://doi.org/10.1074/jbc.M513746200) PMID: 16407285

- 525 64. Kruegel J, Sadowski B, Miosge N. Nidogen-1 and nidogen-2 in healthy human cartilage and in late-  
526 stage osteoarthritis cartilage. *Arthritis Rheum.* 2008 May;58(5):1422-32. doi: [10.1002/art.23480](https://doi.org/10.1002/art.23480)  
527 PMID: 18438862
- 528 65. Maly K, Schaible I, Riegger J, Brenner RE, Meurer A, Zaucke F. The expression of thrombospondin-4  
529 correlates with disease severity in osteoarthritic knee cartilage. *Int J Mol Sci.* 2019 Jan;20(2):447.  
530 doi: [10.3390/ijms20020447](https://doi.org/10.3390/ijms20020447) PMID: 30669608
- 531 66. Kobayashi K, Jokaji R, Miyazawa-Hira M, Takatsuka S, Tanaka A, Ooi K, et al. Elastin-derived peptides  
532 are involved in the process of human temporomandibular disorder by inducing inflammatory  
533 responses in synovial cells. *Mol Med Rep.* 2017 Sep;16(3):3147-54. doi: [10.3892/mmr.2017.7012](https://doi.org/10.3892/mmr.2017.7012)  
534 PMID: 28714016
- 535 67. Lord MS, Tang F, Rnjak-Kovacina J, Smith JGW, Melrose J, Whitelock JM. The multifaceted roles of  
536 perlecan in fibrosis. *Matrix Biol.* 2018 Aug;68-69:150-66. doi: [10.1016/j.matbio.2018.02.013](https://doi.org/10.1016/j.matbio.2018.02.013) PMID:  
537 29475023
- 538 68. Mayer U, Kohfeldt E, Timpl R. Structural and genetic analysis of laminin-nidogen interaction. *Ann NY*  
539 *Acad Sci.* 1998 Oct;857:130-42. doi: [10.1111/j.1749-6632.1998.tb10113.x](https://doi.org/10.1111/j.1749-6632.1998.tb10113.x) PMID: 9917838
- 540 69. Hohenester E, Yurchenco PD. Laminins in basement membrane assembly. *Cell Adh Migr.* 2013  
541 Jan;7(1):56-63. doi: [10.4161/cam.21831](https://doi.org/10.4161/cam.21831) PMID: 23076216
- 542 70. Funk SD, Miner JH. Muscular dystrophy meets protein biochemistry, the mother of invention. *J Clin*  
543 *Invest.* 2017 Mar;127(3):798-800. doi: [10.1172/JCI92847](https://doi.org/10.1172/JCI92847) PMID: 28218619
- 544 71. Holmes AC, Basore K, Fremont DH, Diamond MS. A molecular understanding of alphavirus entry.  
545 *PLOS Pathog.* 2020 Oct;16(10):e1008876. doi: [10.1371/journal.ppat.1008876](https://doi.org/10.1371/journal.ppat.1008876) PMID: 33091085
- 546 72. Sottrup-Jensen L, Sand O, Kristensen L, Fey GH. The  $\alpha$ -macroglobulin bait region: Sequence diversity  
547 and localization of cleavage sites for proteinases in five mammalian  $\alpha$ -macroglobulins. *J Biol Chem.*  
548 1989 Sep;264(27):15781-9. PMID: 2476433
- 549 73. Gettins PGW, Hahn KH, Crews BC.  $\alpha$ 2-macroglobulin bait region variants: A role for the bait region in  
550 tetramer formation. *J Biol Chem.* 1995 Jun;270(23):14160-7. doi: [10.1074/jbc.270.23.14160](https://doi.org/10.1074/jbc.270.23.14160) PMID:  
551 7539801
- 552 74. Carrasco L, Sanz MA, Gonzalez-Almela E. The regulation of translation in alphavirus-infected cells.  
553 *Viruses.* 2018 Feb;10(2):70. doi: [10.3390/v10020070](https://doi.org/10.3390/v10020070) PMID: 29419763
- 554 75. Harrington HR, Zimmer MH, Chamness LM, Nash V, Penn WD, Miller TF, et al. Cotranslational folding  
555 stimulates programmed ribosomal frameshifting in the alphavirus structural polyprotein. *J Biol*  
556 *Chem.* 2020 May;295(20):6798-808. doi: [10.1074/jbc.RA120.012706](https://doi.org/10.1074/jbc.RA120.012706) PMID: 32169904
- 557 76. Chauvin C, Salhi S, Le Goff C, Viranaicken W, Diop D, Jean-Jean O. Involvement of human release  
558 factors eRF3a and eRF3b in translation termination and regulation of the termination complex  
559 formation. *Mol Cell Biol.* 2005 Jul;25(14):5801-11. doi: [10.1128/MCB.25.14.5801-5811.2005](https://doi.org/10.1128/MCB.25.14.5801-5811.2005) PMID:  
560 15987998
- 561 77. Jaafar ZA, Kieft JS. Viral RNA structure-based strategies to manipulate translation. *Nat Rev Microbiol.*  
562 2019 Jan;17(2):110-23. doi: [10.1038/s41579-018-0117-x](https://doi.org/10.1038/s41579-018-0117-x) PMID: 30514982
- 563 78. Landers VD, Wilkey DW, Merchant ML, Mitchell TC, Sokoloski KJ. The alphavirus capsid protein  
564 inhibits IRAK1-dependent TLR signaling. *Viruses.* 2021 Feb;13(3):377. doi: [10.3390/v13030377](https://doi.org/10.3390/v13030377) PMID:  
565 33673546
- 566 79. Lark T, Keck F, Narayanan A. Interactions of alphavirus nsP3 protein with host proteins. *Front*  
567 *Microbiol.* 2018 Jan;8:2652. doi: [10.3389/fmicb.2017.02652](https://doi.org/10.3389/fmicb.2017.02652) PMID: 29375517
- 568 80. Mazzon M, Castro C, Thaa B, Liu L, Mutso M, Liu X, et al. Alphavirus-induced hyperactivation of  
569 PI3K/AKT directs pro-viral metabolic changes. *PLOS Pathog.* 2018 Jan;14(1):e1006835. doi:  
570 [10.1371/journal.ppat.1006835](https://doi.org/10.1371/journal.ppat.1006835) PMID: 29377936
- 571 81. Lokireddy S, Vemula S, Vadde R. Connective tissue metabolism in chikungunya patients. *Virol J.* 2008  
572 Feb;5:31. doi: [10.1186/1743-422X-5-31](https://doi.org/10.1186/1743-422X-5-31) PMID: 18302795

- 573 82. Neuvonen M, Kazlauskas A, Martikainen M, Hinkkanen A, Ahola T, Saksela K. SH3 domain-mediated  
574 recruitment of host cell amphiphysins by alphavirus nsP3 promotes viral RNA replication. PLOS  
575 Pathog. 2011 Nov;7(11):e1002383. doi: [10.1371/journal.ppat.1002383](https://doi.org/10.1371/journal.ppat.1002383) PMID: 22114558
- 576 83. Tossavainen H, Aitio O, Hellman M, Saksela K, Permi P. Structural basis of the high affinity  
577 interaction between the *Alphavirus* nonstructural protein-3 (nsP3) and the SH3 domain of  
578 amphiphysin-2. J Biol Chem. 2016 Jul;291(31):16307-17. doi: [10.1074/jbc.M116.732412](https://doi.org/10.1074/jbc.M116.732412) PMID:  
579 27268056
- 580 84. Chang J, Block TM, Guo JT. Viral resistance of MOGS-CDG patients implies a broad-spectrum strategy  
581 against acute virus infection. Antivir Ther. 2015 Jul;20(3):257-9. doi: [10.3851/IMP2907](https://doi.org/10.3851/IMP2907) PMID:  
582 25318123
- 583 85. Alavi A, Axford J. Evaluation of  $\beta$ 1,4-galactosyltransferase in rheumatoid arthritis and its role in the  
584 glycosylation network associated with this disease. Glycoconj J. 1995 Jun;12(3):206-10. doi:  
585 [10.1007/BF00731321](https://doi.org/10.1007/BF00731321) PMID: 7496133
- 586 86. Ninagawa S, Okada T, Sumitomo Y, Kamiya Y, Kato K, Horimoto S, et al. EDEM2 initiates mammalian  
587 glycoprotein ERAD by catalyzing the first mannose trimming step. J Cell Biol. 2014 Aug;206(3):347-  
588 56. doi: [10.1083/jcb.201404075](https://doi.org/10.1083/jcb.201404075) PMID: 25092655
- 589 87. Frabutt DA, Zheng YH. Arms race between enveloped viruses and the host ERAD machinery. Viruses.  
590 2016 Sep;8(9):255. doi: [10.3390/v8090255](https://doi.org/10.3390/v8090255) PMID: 27657106
- 591 88. McDowell W, Romero PA, Datema R, Schwarz RT. Glucose trimming and mannose trimming affect  
592 different phases of the maturation of Sindbis virus in infected BHK cells. Virology. 1987  
593 Nov;161(1):37-44. doi: [10.1016/0042-6822\(87\)90168-1](https://doi.org/10.1016/0042-6822(87)90168-1) PMID: 2960074
- 594 89. Gliedman JB, Smith JF, Brown DT. Morphogenesis of Sindbis virus in cultured *Aedes albopictus* cells. J  
595 Virol. 1975 Oct;16(4):913-26. doi: [10.1128/JVI.16.4.913-926.1975](https://doi.org/10.1128/JVI.16.4.913-926.1975) PMID: 170422
- 596 90. Kubomura D, Ueno T, Yamada M, Tomonaga A, Nagaoka I. Effect of N-acetylglucosamine  
597 administration on cartilage metabolism and safety in healthy subjects without symptoms of arthritis:  
598 A case report. Exp Ther Med. 2017 Apr;13(4):1614-21. doi: [10.3892/etm.2017.4140](https://doi.org/10.3892/etm.2017.4140) PMID: 28413518
- 599 91. Kaur R, Neetu, Mudgal R, Jose J, Kumar P, Tomar S. Glycan-dependent chikungunya viral infection  
600 divulged by antiviral activity of NAG specific chi-like lectin. Virology. 2019 Jan;526:91-8. doi:  
601 [10.1016/j.virol.2018.10.009](https://doi.org/10.1016/j.virol.2018.10.009) PMID: 30388630
- 602 92. Lin Y, Wu C, Wang X, Liu S, Zhao K, Kemper T, et al. Glucosamine promotes hepatitis B virus  
603 replication through its dual effects in suppressing autophagic degradation and inhibiting MTORC1  
604 signaling. Autophagy. 2020 Mar;16(3):548-61. doi: [10.1080/15548627.2019.1632104](https://doi.org/10.1080/15548627.2019.1632104) PMID:  
605 31204557
- 606 93. Kim HB, Lee SW, Mun CH, Yoon JY, Pai J, Shin I, et al. O-linked N-acetylglucosamine glycosylation of  
607 p65 aggravated the inflammation in both fibroblast-like synoviocytes stimulated by tumor necrosis  
608 factor- $\alpha$  and mice with collagen induced arthritis. Arthritis Res Ther. 2015 Sep;17(1):248. doi:  
609 [10.1186/s13075-015-0762-7](https://doi.org/10.1186/s13075-015-0762-7) PMID: 26370562
- 610 94. Decque A, Joffre O, Magalhaes JG, Cossec JC, Blecher-Gonen R, Lapaquette P, et al. Sumoylation  
611 coordinates the repression of inflammatory and anti-viral gene-expression programs during innate  
612 sensing. Nat Immunol. 2016 Feb;17(2):140-9. doi: [10.1038/ni.3342](https://doi.org/10.1038/ni.3342) PMID: 26657003
- 613 95. Stokes S, Almire F, Tatham MH, McFarlane S, Mertens P, Pondeville E, et al. The SUMOylation  
614 pathway suppresses arbovirus replication in *Aedes aegypti* cells. PLOS Pathog. 2020  
615 Dec;16(12):e1009134. doi: [10.1371/journal.ppat.1009134](https://doi.org/10.1371/journal.ppat.1009134) PMID: 33351855
- 616 96. Corso D, Chemello F, Alessio E, Urso I, Ferrarese G, Bazzega M, et al. MyoData: An expression  
617 knowledgebase at single cell/nucleus level for the discovery of coding-noncoding RNA functional  
618 interactions in skeletal muscle. Comput Struct Biotechnol J. 2021 Jul;19:4142-55. doi:  
619 [10.1016/j.csbj.2021.07.020](https://doi.org/10.1016/j.csbj.2021.07.020) PMID: 34527188



- 620 97. Ozden S, Huerre M, Riviere JP, Coffey LL, Afonso PV, Mouly V, et al. Human muscle satellite cells as  
621 targets of chikungunya virus infection. PLOS One. 2007 Jun;2(6):e527. doi:  
622 [10.1371/journal.pone.0000527](https://doi.org/10.1371/journal.pone.0000527) PMID: 17565380
- 623 98. Rohatgi A, Corbo JC, Monte K, Higgs S, Vanlandingham DL, Kardon G, et al. Infection of myofibers  
624 contributes to increased pathogenicity during infection with an epidemic strain of chikungunya  
625 virus. J Virol. 2014 Mar;88(5):2414-25. doi: [10.1128/JVI.02716-13](https://doi.org/10.1128/JVI.02716-13) PMID: 24335291
- 626 99. Metz SW, Geertsema C, Martina BE, Andrade P, Heldens JG, van Oers MM, et al. Functional  
627 processing and secretion of chikungunya virus E1 and E2 glycoproteins in insect cells. Virol J. 2011  
628 Jul;8:353. doi: [10.1186/1743-422X-8-353](https://doi.org/10.1186/1743-422X-8-353) PMID: 21762510
- 629 100. Ruiz-Guillen M, Gabev E, Quetglas JI, Casales E, Ballesteros-Briones MC, Poutou J, et al. Capsid-  
630 deficient alphaviruses generate propagative infectious microvesicles at the plasma membrane. Cell  
631 Mol Life Sci. 2016 Apr;73(20):3897-916. doi: [10.1007/s00018-016-2230-1](https://doi.org/10.1007/s00018-016-2230-1) PMID: 27117550
- 632 101. Martinez MG, Kielian M. Intercellular extensions are induced by the alphavirus structural  
633 proteins and mediate virus transmission. PLOS Pathog. 2016 Dec;12(12):e1006061. doi:  
634 [10.1371/journal.ppat.1006061](https://doi.org/10.1371/journal.ppat.1006061) PMID: 27977778
- 635 102. Lee CY, Kam YW, Fric J, Malleret B, Koh EGL, Prakash C, et al. Chikungunya virus neutralization  
636 antigens and direct cell-to-cell transmission are revealed by human antibody-escape mutants. PLOS  
637 Pathog. 2011 Dec;7(12):e1002390. doi: [10.1371/journal.ppat.1002390](https://doi.org/10.1371/journal.ppat.1002390) PMID: 22144891
- 638 103. Varshavsky A. N-degron and C-degron pathways of protein degradation. PNAS. 2019  
639 Jan;116(2):358-66. doi: [10.1073/pnas.1816596116](https://doi.org/10.1073/pnas.1816596116) PMID: 30622213
- 640 104. Wang Z, Xia X, Yang X, Zhang X, Liu Y, Wu D, et al. A picorna-like virus suppresses the N-end rule  
641 pathway to inhibit apoptosis. eLife. 2017 Dec;6:e30590. doi: [10.7554/eLife.30590](https://doi.org/10.7554/eLife.30590) PMID: 29231806
- 642 105. Dissmeyer N, Rivas S, Graciet E. Life and death of proteins after protease cleavage: protein  
643 degradation by the N-end rule pathway. New Phytol. 2018 May;218(3):929-35. doi:  
644 [10.1111/nph.14619](https://doi.org/10.1111/nph.14619) PMID: 28581033
- 645 106. Madsen L, Schulze A, Seeger M, Hartmann-Petersen R. Ubiquitin domain proteins in disease.  
646 BMC Biochem. 2007 Nov;8(Suppl 1):S1. doi: [10.1186/1471-2091-8-S1-S1](https://doi.org/10.1186/1471-2091-8-S1-S1) PMID: 18047733
- 647 107. Fry MY, Saladi SM, Clemons WM. The STI1-domain is a flexible alpha-helical fold with a  
648 hydrophobic groove. Protein Sci. 2021 Apr;30(4):882-98. doi: [10.1002/pro.4049](https://doi.org/10.1002/pro.4049) PMID: 33620121
- 649 108. Itakura E, Zavodszky E, Shao S, Wohlever ML, Keenan RJ, Hegde RS. Ubiquilins chaperone and  
650 triage mitochondrial membrane proteins for degradation. Mol Cell. 2016 Jul;63(1):21-33. doi:  
651 [10.1016/j.molcel.2016.05.020](https://doi.org/10.1016/j.molcel.2016.05.020) PMID: 27345149
- 652 109. Atallah I, Quinodoz M, Campos-Xavier B, Peter VG, Fouriki A, Bonvin C, et al. Immune deficiency,  
653 autoimmune disease and intellectual disability: A pleiotropic caused by biallelic variants in the TPP2  
654 gene. Clin Genet. 2021 Jun;99(6):780-8. doi: [10.1111/cge.13942](https://doi.org/10.1111/cge.13942) PMID: 33586135
- 655 110. Reits E, Neijssen J, Herberts C, Benckhuijsen W, Janssen L, Drijfhout JW, et al. A major role for  
656 TPPII in trimming proteasomal degradation products for MHC class I antigen presentation.  
657 Immunity. 2004 Apr;20(4):495-506. doi: [10.1016/s1074-7613\(04\)00074-3](https://doi.org/10.1016/s1074-7613(04)00074-3) PMID: 15084277
- 658 111. Pohlers D, Beyer A, Koczan D, Wilhelm T, Thiesen HJ, Kinne RW. Constitutive upregulation of the  
659 transforming growth factor- $\beta$  pathway in rheumatoid arthritis synovial fibroblasts. Arthritis Res  
660 Ther. 2007 Jun;9(3):R59. doi: [10.1186/ar2217](https://doi.org/10.1186/ar2217) PMID: 17594488
- 661 112. Uhrlaub JL, Pulko V, DeFilippis VR, Broeckel R, Streblov DN, Coleman GD, et al. Dysregulated  
662 TGF- $\beta$  production underlies the age-related vulnerability to chikungunya virus. PLOS Pathog. 2016  
663 Oct;12(10):e1005891. doi: [10.1371/journal.ppat.1005891](https://doi.org/10.1371/journal.ppat.1005891) PMID: 27736984
- 664 113. Saxena T, Tandon B, Sharma S, Chameettachal S, Ray P, Ray AR, et al. Combined miRNA and  
665 mRNA signature identifies key molecular players and pathways involved in chikungunya virus  
666 infection in human cells. PLOS One. 2013 Nov;8(11):e79886. doi: [10.1371/journal.pone.0079886](https://doi.org/10.1371/journal.pone.0079886)  
667 PMID: 24278205

- 668 114. Ge G, Greenspan DS. BMP1 controls TGF $\beta$ 1 activation via cleavage of latent TGF $\beta$ -binding  
669 protein. *J Cell Biol.* 2006 Oct;175(1):111-20. doi: [10.1083/jcb.200606058](https://doi.org/10.1083/jcb.200606058) PMID: 17015622
- 670 115. Keski-Oja J. Transforming growth factor beta. In: Schwab M, editor. *Encyclopedia of cancer.*  
671 Berlin: Springer; 2008. pp. 3033-7. doi: [10.1007/978-3-540-47648-1\\_5916](https://doi.org/10.1007/978-3-540-47648-1_5916)
- 672 116. Wu M, Chen G, Li YP. TGF- $\beta$  and BMP signaling in osteoblast, skeletal development, and bone  
673 formation, homeostasis and disease. *Bone Res.* 2016 Apr;4:16009. doi: [10.1038/boneres.2016.9](https://doi.org/10.1038/boneres.2016.9)  
674 PMID: 27563484
- 675 117. Spinella-Jaegle S, Roman-Roman S, Faucheu C, Dunn FW, Kawai S, Gallea S, et al. Opposite  
676 effects of bone morphogenetic protein-2 and transforming growth factor- $\beta$ 1 on osteoblast  
677 differentiation. *Bone.* 2001 Oct;29(4):323-30. doi: [10.1016/s8756-3282\(01\)00580-4](https://doi.org/10.1016/s8756-3282(01)00580-4) PMID: 11595614
- 678 118. Kasagi S, Chen W. TGF-beta1 on osteoimmunology and the bone component cells. *Cell Biosci.*  
679 2013 Jan;3(1):4. doi: [10.1186/2045-3701-3-4](https://doi.org/10.1186/2045-3701-3-4) PMID: 23321200
- 680 119. Chen W, Foo SS, Rulli NE, Taylor A, Sheng KC, Herrero LJ, et al. Arthritogenic alphaviral infection  
681 perturbs osteoblast function and triggers pathologic bone loss. *PNAS.* 2014 Apr;111(16):6040-5. doi:  
682 [10.1073/pnas.1318859111](https://doi.org/10.1073/pnas.1318859111) PMID: 24733914
- 683 120. Chen W, Foo SS, Sims NA, Herrero LJ, Walsh NC, Mahalingam S. Arthritogenic alphaviruses: new  
684 insights into arthritis and bone pathology. *Trends Microbiol.* 2015 Jan;23(1):35-43. doi:  
685 [10.1016/j.tim.2014.09.005](https://doi.org/10.1016/j.tim.2014.09.005) PMID: 25449049
- 686 121. Noret M, Herrero L, Rulli N, Rolph M, Smith PN, Li RW, et al. Interleukin 6, RANKL, and  
687 osteoprotegerin expression by chikungunya virus-infected human osteoblasts. *J Infect Dis.* 2012  
688 Aug;206(3):457-9. doi: [10.1093/infdis/jis368](https://doi.org/10.1093/infdis/jis368) PMID: 22634878
- 689 122. Phuklia W, Kasisith J, Modhiran N, Rodpai E, Thannagith M, Thongsakulprasert T, et al.  
690 Osteoclastogenesis induced by CHIKV-infected fibroblast-like synoviocytes: a possible interplay  
691 between synoviocytes and monocytes/macrophages in CHIKV-induced arthralgia/arthritis. *Virus Res.*  
692 2013 Nov;177(2):179-88. doi: [10.1016/j.virusres.2013.08.011](https://doi.org/10.1016/j.virusres.2013.08.011) PMID: 24012515
- 693 123. Roy E, Shi W, Duan B, Reid SP. Chikungunya virus infection impairs the function of osteogenic  
694 cells. *mSphere.* 2020 Jun;5(3):e00347-20. doi: [10.1128/mSphere.00347-20](https://doi.org/10.1128/mSphere.00347-20) PMID: 32493723
- 695 124. Lainez B, Fernandez-Real JM, Romero X, Esplugues E, Canete JD, Ricart W, et al. Identification  
696 and characterization of a novel spliced variant that encodes human soluble tumor necrosis factor  
697 receptor 2. *Int Immunol.* 2004 Jan;16(1):169-77. doi: [10.1093/intimm/dxh014](https://doi.org/10.1093/intimm/dxh014) PMID: 14688072
- 698 125. Le HT, Harton JA. Pyrin- and CARD-only proteins as regulators of NLR functions. *Front Immunol.*  
699 2013 Sep;4:275. doi: [10.3389/fimmu.2013.00275](https://doi.org/10.3389/fimmu.2013.00275) PMID: 24062743
- 700 126. Mounce BC, Cesaro T, Moratorio G, Hooikaas PJ, Yakovleva A, Werneke SW, et al. Inhibition of  
701 polyamine biosynthesis is a broad-spectrum strategy against RNA viruses. *J Virol.* 2016  
702 Oct;90(21):9683-92. doi: [10.1128/JVI.01347-16](https://doi.org/10.1128/JVI.01347-16) PMID: 27535047
- 703 127. Mounce BC, Olsen ME, Vignuzzi M, Connor JH. Polyamines and their roles in virus infection.  
704 *Microbiol Mol Biol Rev.* 2017 Sep;81(4):e00029-17. doi: [10.1128/MMBR.00029-17](https://doi.org/10.1128/MMBR.00029-17) PMID: 28904024
- 705 128. Yuan H, Wu SX, Zhou YF, Peng F. Spermidine inhibits joints inflammation and macrophage  
706 activation in mice with collagen-induced arthritis. *J Inflamm Res.* 2021 Jun;14:2713-21. doi:  
707 [10.2147/JIR.S313179](https://doi.org/10.2147/JIR.S313179) PMID: 34194234
- 708 129. Sacitharan PK, Lwin S, Gharios GB, Edwards JR. Spermidine restores dysregulated autophagy and  
709 polyamine synthesis in aged and osteoarthritic chondrocytes via EP300. *Exp Mol Med.* 2018  
710 Sep;50(9):1-10. doi: [10.1038/s12276-018-0149-3](https://doi.org/10.1038/s12276-018-0149-3) PMID: 30232322
- 711 130. Chen Z, Lin CX, Song B, Li CC, Qiu JX, Li SX, et al. Spermidine activated RIP1 deubiquitination to  
712 inhibit TNF- $\alpha$ -induced NF- $\kappa$ B/p65 signaling pathway in osteoarthritis. *Cell Death Dis.* 2020  
713 Jul;11(7):503. doi: [10.1038/s41419-020-2710-y](https://doi.org/10.1038/s41419-020-2710-y) PMID: 32632306

- 714 131. Karouzakis E, Gay RE, Gay S, Neidhart M. Increased recycling of polyamines is associated with  
715 global DNA hypomethylation in rheumatoid arthritis synovial fibroblasts. *Arthritis Rheum.* 2012  
716 Jun;64(6):1809-17. doi: [10.1002/art.34340](https://doi.org/10.1002/art.34340) PMID: 22170508
- 717 132. Flescher E, Bowlin TL, Ballester A, Houk R, Talal N. Increased polyamines may downregulate  
718 interleukin 2 production in rheumatoid arthritis. *J Clin Invest.* 1989 Apr;83(4):1356-62. doi:  
719 [10.1172/JCI114023](https://doi.org/10.1172/JCI114023) PMID: 2784801
- 720 133. Gutierrez E, Shin BS, Woolstenhulme CJ, Kim JR, Saini P, Buskirk AR, et al. eIF5A promotes  
721 translation of polyproline motifs. *Mol Cell.* 2013 Jul;51(1):35-45. doi: [10.1016/j.molcel.2013.04.021](https://doi.org/10.1016/j.molcel.2013.04.021)  
722 PMID: 23727016
- 723 134. Schuller AP, Wu CCC, Dever TE, Buskirk AR, Green R. eIF5A functions globally in translation  
724 elongation and termination. *Mol Cell.* 2017 Apr;66(2):194-205.e5. doi: [10.1016/j.molcel.2017.03.003](https://doi.org/10.1016/j.molcel.2017.03.003)  
725 PMID: 28392174
- 726 135. Hryniewicz MM, Vonder Haar RA. Polyamines enhance readthrough of the UGA termination  
727 codon in a mammalian messenger RNA. *Mol Gen Genet.* 1983 May;190(2):336-43. doi:  
728 [10.1007/BF00330661](https://doi.org/10.1007/BF00330661) PMID: 6576222
- 729 136. Kim KW, Kim BM, Lee KA, Lee SH, Firestein GS, Kim HR. Histamine and histamine H4 receptor  
730 promotes osteoclastogenesis in rheumatoid arthritis. *Sci Rep.* 2017 Apr;7(1):1197. doi:  
731 [10.1038/s41598-017-01101-y](https://doi.org/10.1038/s41598-017-01101-y) PMID: 28446753
- 732 137. Chiurciu V, Leuti A, Maccarrone M. Bioactive lipids and chronic inflammation: managing the  
733 fire within. *Front Immunol.* 2018 Jan;9:38. doi: [10.3389/fimmu.2018.00038](https://doi.org/10.3389/fimmu.2018.00038) PMID: 29434586
- 734 138. Hassan MQ, Hadi RA, Al-Rawi ZS, Padron VA, Stohs SJ. The glutathione defense system in the  
735 pathogenesis of rheumatoid arthritis. *J Appl Toxicol.* 2001 Feb;21(1):69-73. doi: [10.1002/jat.736](https://doi.org/10.1002/jat.736)  
736 PMID: 11180282
- 737 139. Elmasri Z, Nasal BL, Jose J. Alphavirus-induced membrane rearrangements during replication,  
738 assembly, and budding. *Pathogens.* 2021 Aug;10(8):984. doi: [10.3390/pathogens10080984](https://doi.org/10.3390/pathogens10080984) PMID:  
739 34451448
- 740 140. Jose J, Taylor AB, Kuhn RJ. Spatial and temporal analysis of alphavirus replication and assembly  
741 in mammalian and mosquito cells. *mBio.* 2017 Feb;8(1):e02294-16. doi: [10.1128/mBio.02294-16](https://doi.org/10.1128/mBio.02294-16)  
742 PMID: 28196962
- 743
